# Supplementary material
Source: PubMed Central journal article supplement (PMC6593875)

# Supplemental Figure 1

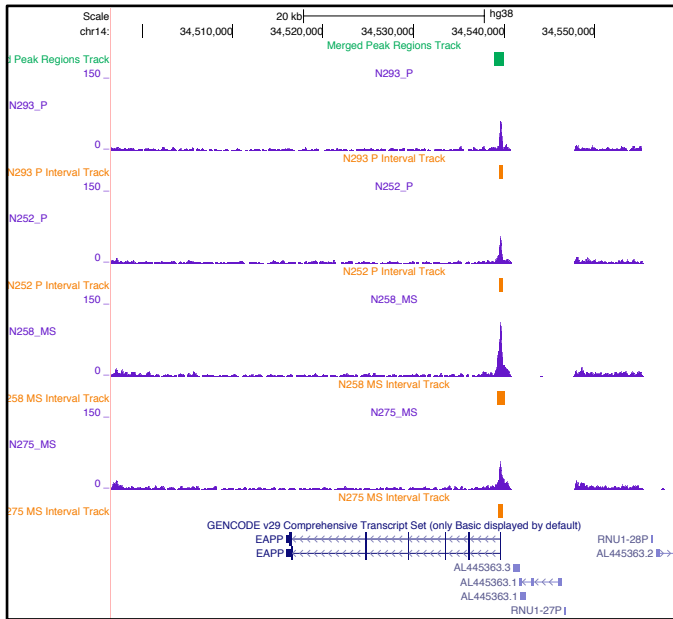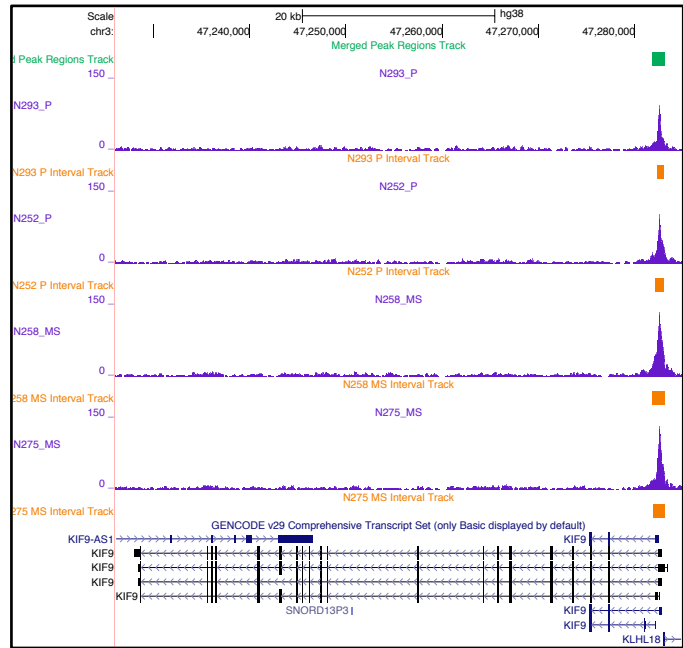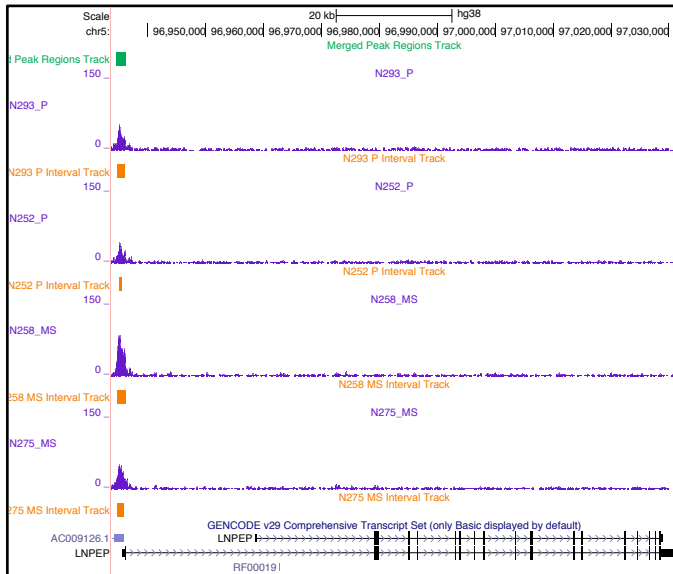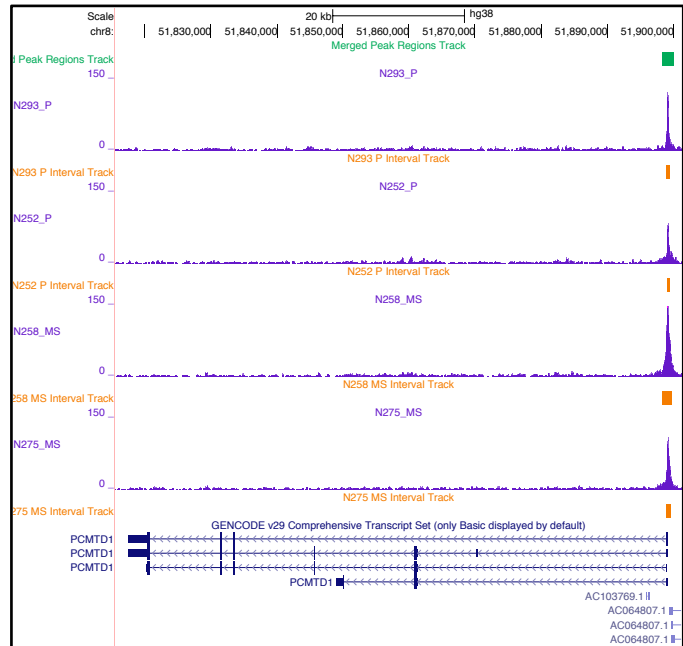

Supplement: fj.201900013R.sf1.pdf [file fj.201900013R.sf1.pdf]

A

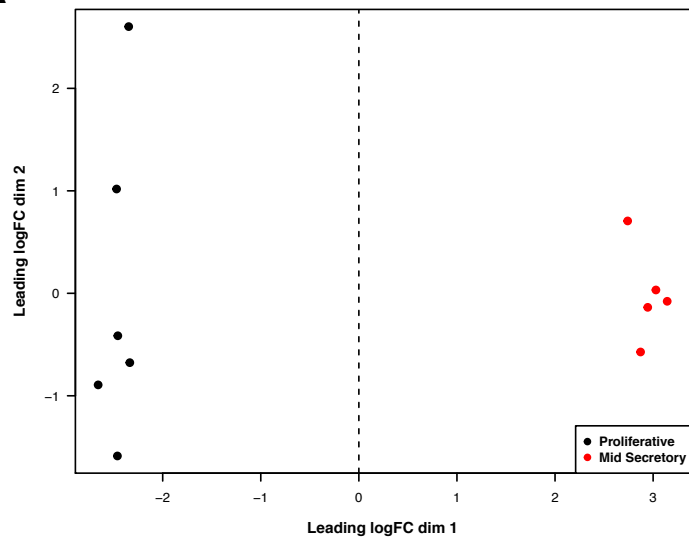

B

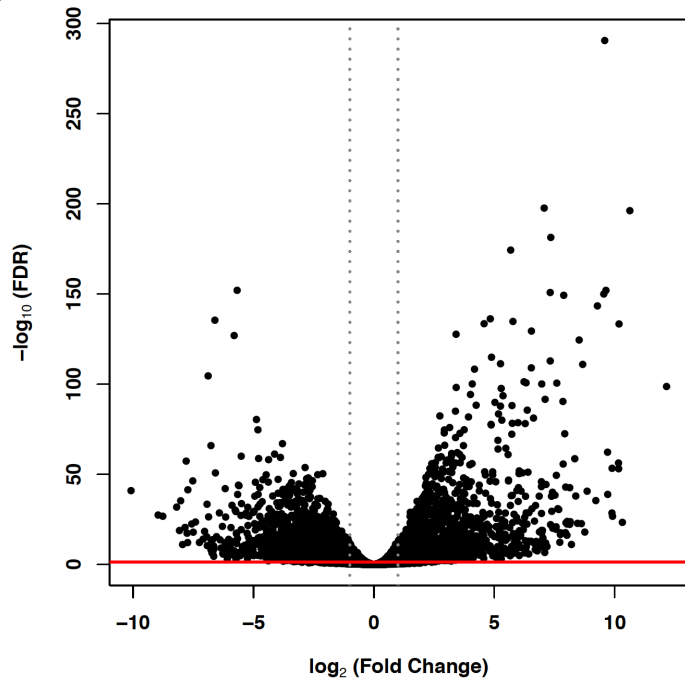

C

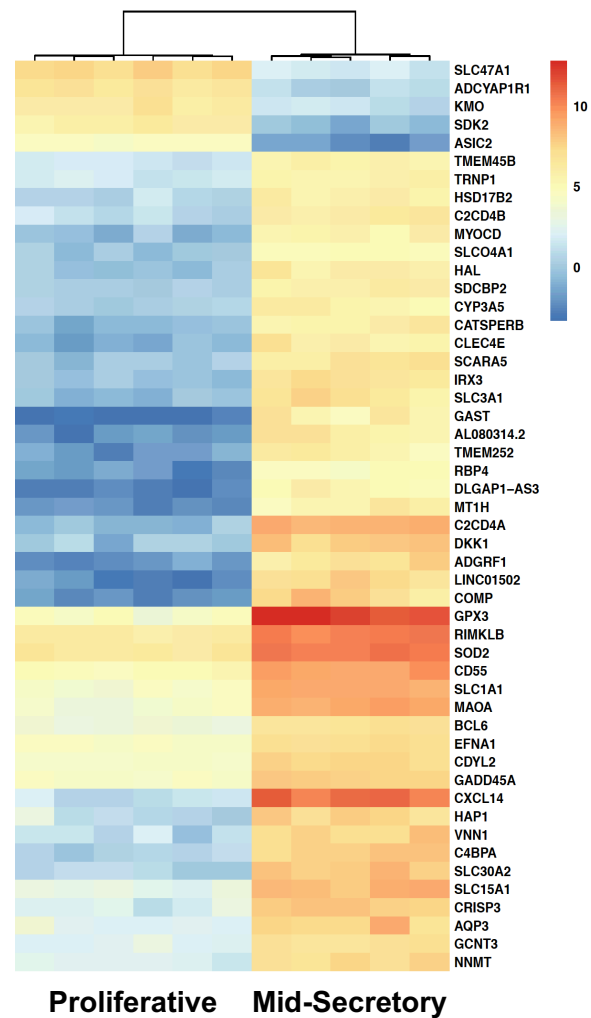

Supplement: fj.201900013R.sf2.pdf [file fj.201900013R.sf2.pdf]
